# Supplementary material for: Rural food security, subsistence agriculture, and seasonality
Source: PLOS journal article supplement (doi:10.1371/journal.pone.0186406), 2017-10-19
Supplement: S1 (10.1371/journal.pone.0186406.s001) [file journal.pone.0186406.s001]

**S1 Fig. Calorie consumption and role of subsistence in rural and urban households combined.**

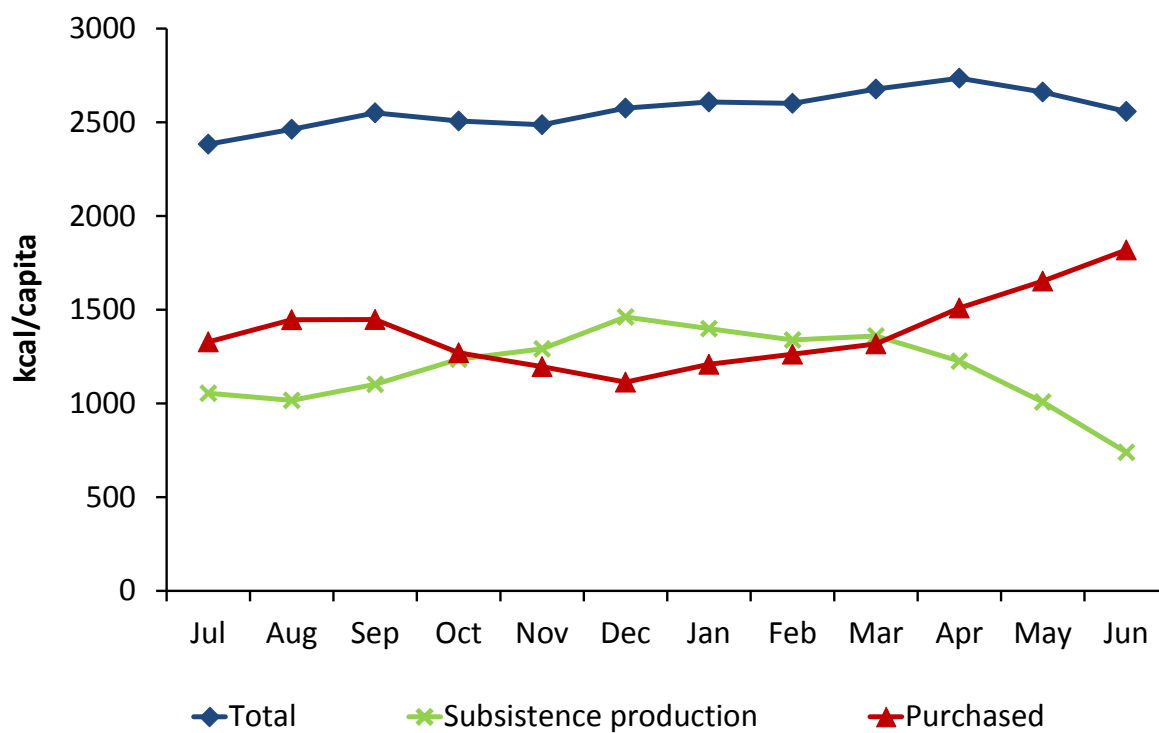

Data from rural and urban households in Ethiopia ( $n=27,835$ ) collected between July 2010 and June 2011. Breakdown of total average daily calorie consumption by calories from subsistence production and calories from food purchased in the market.
